# Supplementary material for: Bidirectional Pathways to Suicide: How Parent-Child Interactions Shape Adolescent Depression and Suicidality in China
Source: Research Square preprint supplement (doi:10.21203/rs.3.rs-6703405/v1), 2025-06-25
Supplement: Supplementary file 1 [file cca4e4961281354f394443f9.docx]

**Supplementary File 1: Semi-Structured Interview Guide**

**Title:** **Semi-Structured Interview Guide for Exploring Bidirectional Pathways in Adolescent Depression and Suicidality within Chinese Family Systems**

**Purpose:** This interview guide was developed to explore the bidirectional physical, emotional, and cognitive impacts of adolescent depression and suicidality on parent-child interactions, as well as changes in family dynamics and systemic support needs, in a qualitative phenomenological study conducted at the Third People’s Hospital of Huai’an City, China, from August to October 2024. The guide was designed to elicit rich, narrative responses from both adolescent patients (aged 11–18 years, diagnosed with depression per ICD-10 criteria, with recent suicide attempts) and their primary caregiver parents, ensuring alignment with the study’s objectives.

Instructions for Interviewers:

- Conduct interviews in a private, comfortable psychotherapy room to ensure confidentiality and participant ease.
- Use open-ended questions to encourage detailed responses, employing active listening, follow-up probing, and summarization to deepen exploration.
- Record non-verbal cues (e.g., gestures, facial expressions) to enrich data interpretation.
- Allow 30–40 minutes per interview, adjusting as needed based on participant responses.
- For adolescents under 16, ensure parental consent and adolescent assent are confirmed prior to the interview.
- Be prepared to provide immediate clinical support if distress or disclosures of imminent self-harm arise.

Interview Guide Structure:

The guide is divided into five key domains, each with primary questions and follow-up probes to elicit detailed responses. Separate but parallel questions are provided for adolescents and parents to capture their unique perspectives while maintaining consistency across dyads. An open-ended closing prompt allows participants to share additional insights.

**Interview Guide for Adolescents**

**Introduction:**
Thank you for participating in this study. We’re here to understand your experiences with depression and how you and your family interact. There are no right or wrong answers, and everything you share is confidential. You can skip any question or stop at any time. The interview will take about 30–40 minutes. Do you have any questions before we begin?

**Domain 1: Awareness of Mutual Influence of Illness Experiences**

1. Can you describe how your depression or suicidal thoughts affect your daily interactions with your parents?
   - Probe: Are there specific moments when you feel your condition changes how your parents act or feel toward you?
   - Probe: How do you think your parents’ emotions or behaviors impact your own feelings or thoughts about yourself?
2. Have you noticed any changes in your parents’ health or mood since you’ve been struggling with depression or suicidal thoughts?
   - Probe: Can you give an example of a time when you felt your condition affected their physical or emotional well-being?

**Domain 2: Willingness to Share Disease-Related Experiences and Emotions**

1. How comfortable do you feel sharing your feelings about depression or suicidal thoughts with your parents?

- Probe: What makes it easier or harder to talk to them about what you’re going through?
- Probe: Are there things you wish your parents understood better about your experiences?

1. When you do share your feelings, how do your parents usually respond, and how does their response make you feel?
   - Probe: Can you describe a specific conversation that felt helpful or unhelpful?

**Domain 3: Perceived Changes in Family Dynamics**

1. How has your depression or suicidal behavior changed the way your family functions or gets along?

- Probe: Have you noticed changes in your parents’ relationship with each other or with you?
- Probe: Are there new roles or responsibilities in the family because of your condition?

1. How do you feel about the support or care your parents provide for you right now?
   - Probe: Are there ways their support feels helpful, overwhelming, or something else?

**Domain 4: Additional Factors Influencing Parent-Child Interactions**

1. Are there other things (like school, friends, or cultural expectations) that affect how you and your parents interact about your depression or suicidal thoughts?

- Probe: How do pressures like school performance or family expectations influence your relationship with your parents?
- Probe: Have you experienced stigma or judgment from others that affects how you and your parents deal with your condition?

**Domain 5: Current Support Needs and Desired Assistance**

1. What kind of support do you feel you need most right now to help with your depression or suicidal thoughts?

- Probe: Are there specific things your parents, doctors, or others could do to help you feel better supported?
- Probe: What would an ideal support system look like for you?

**Closing Prompt:** **Is there anything else you’d like to share about your experiences, your family, or what might help you and your parents through this time?**

**Interview Guide for Parents**

**Introduction:**Thank you for participating in this study. We’re here to understand your experiences as a parent of an adolescent with depression and how you and your child interact. There are no right or wrong answers, and everything you share is confidential. You can skip any question or stop at any time. The interview will take about 30–40 minutes. Do you have any questions before we begin?

**Domain 1**: **Awareness of Mutual Influence of Illness Experiences**

1. Can you describe how your child’s depression or suicidal behavior affects your daily interactions with them?
   - Probe: Are there specific moments when their condition changes how you feel or act toward them?
   - Probe: How do you think your own emotions or behaviors impact your child’s feelings or thoughts?
2. Have you noticed any changes in your own health or mood since your child began struggling with depression or suicidal thoughts?
   - Probe: Can you give an example of a time when their condition affected your physical or emotional well-being?

Domain 2: Willingness to Share Disease-Related Experiences and Emotions

1. How comfortable do you feel talking to your child about their depression or suicidal thoughts?

- Probe: What makes it easier or harder to have these conversations?
- Probe: Are there things you wish you understood better about your child’s experiences?

1. When you try to discuss your child’s condition with them, how do they respond, and how does their response affect you?
   - Probe: Can you describe a specific conversation that felt helpful or challenging?

**Domain 3: Perceived Changes in Family Dynamics**

1. How has your child’s depression or suicidal behavior changed the way your family functions or gets along?

- Probe: Have you noticed changes in your relationship with your spouse or other family members?
- Probe: Have your roles or responsibilities as a parent changed because of your child’s condition?

1. How do you feel about the support or care you’re able to provide for your child right now?
   - Probe: Are there ways you feel your support is effective, insufficient, or challenging to provide?

**Domain 4: Additional Factors Influencing Parent-Child Interactions**

1. Are there other factors (like work, financial pressures, or cultural expectations) that affect how you and your child interact about their depression or suicidal thoughts?

- Probe: How do external pressures, such as financial costs or societal attitudes, influence your relationship with your child?
- Probe: Have you experienced stigma or judgment from others that affects how you support your child?

**Domain 5: Current Support Needs and Desired Assistance**

1. What kind of support do you feel you need most right now to help you care for your child?

- Probe: Are there specific resources or assistance from healthcare providers, schools, or others that would help you?
- Probe: What would an ideal support system look like for you and your family?

**Closing Prompt: Is there anything else you’d like to share about your experiences, your family, or what might help you and your child through this time?**
